# Supplementary material for: Functional Role of Aspergillus carbonarius AcOTAbZIP Gene, a bZIP Transcription Factor within the OTA Gene Cluster
Source: PubMed Central journal article supplement (PMC7913050; doi:10.3390/toxins13020111), 2021-02-02
Supplement: toxins-13-00111-s001.pdf [file toxins-13-00111-s001.pdf]

# Supplementary Materials: Functional Role of *Aspergillus carbonarius* AcOTAbZIP Gene, a bZIP Transcription Factor within the OTA Gene Cluster

Donato Gerin, Federica Garrapa, Ana-Rosa Ballester, Luis González-Candelas, Rita Milvia De Miccolis Angelini, Francesco Faretra and Stefania Pollastro

**Table S1.** Location of the putative-OTA-gene cluster in the genome of the *Aspergillus* species and *Penicillium nordicum*.

| Species (Strain)                                       | Putative OTA-Gene Cluster           |             |
|--------------------------------------------------------|-------------------------------------|-------------|
|                                                        | Position*                           | Length (bp) |
| <i>A. affinis</i> (CBS 129190)                         | scaffold 263: 13,600–37,157         | 23,557      |
| <i>A. albertensis</i> (IBT 14317)                      | scaffold 45: 173,601–196,151        | 22,550      |
| <i>A. alliaceus</i> (CBS 536.65)                       | scaffold 38: 62,845–85,005          | 22,160      |
| <i>A. carbonarius</i> (ITEM 5010)                      | scaffold 12: 943,452–965,219        | 21,767      |
| <i>A. cretensis</i> (CBS 112802)                       | scaffold 236: 237–24,459            | 24,223      |
| <i>A. elegans</i> (CBS 116.39)                         | scaffold 6: 221,286–244,294         | 23,008      |
| <i>A. flocculosus</i> (CBS 112785)                     | scaffold 15: 210,525–234,022        | 23,497      |
| <i>A. muricatus</i> (CBS 112808)                       | scaffold 98: 4,901–29,046           | 24,145      |
| <i>A. niger</i> ( <i>lacticoffeatus</i> ) (CBS 101883) | scaffold 40: 220,217–241,951        | 21,734      |
| <i>A. niger</i> (CBS 513.88)                           | supercontig 15: 1,855,355–1,877,016 | 21,661      |
| <i>A. niger</i> (ATCC 13496)                           | scaffold 10: 59,997–82,127          | 22,130      |
| <i>A. ochraceus</i> (fc-1)                             | Scaffold 8: 411,427–436,227         | 24,800      |
| <i>A. pulvericola</i> (CBS 137327)                     | scaffold 10: 164,973–189,210        | 24,237      |
| <i>A. roseoglobulosus</i> (CBS112800)                  | scaffold 81: 55,095–78,939          | 23,884      |
| <i>A. sclerotiocarbonarius</i> (CBS 121057)            | scaffold 107: 8,257–27,296          | 19,039      |
| <i>A. sclerotioniger</i> (CBS 115572)                  | scaffold 10: 314,539–335,789        | 21,250      |
| <i>A. steynii</i> (IBT 23096)                          | scaffold 3: 425,017–448,672         | 23,655      |
| <i>A. subramanianii</i> (CBS 138230)                   | scaffold 42: 121,882–145,732        | 23,850      |
| <i>A. welwitschiae</i> (CBS139.54b)                    | scaffold 25: 369,429–391,102        | 21,673      |
| <i>A. westerdijkiae</i> (CBS 112803)                   | scaffold 73: 110,154–134,954        | 24,800      |
| <i>P. nordicum</i> (DAOMC 185683)                      | scaffold 70: 4,687–26,262           | 21,575      |

\*position of OTA-gene cluster in the fungal genome (genome.jgi.doe.gov) identified based on homology with OTA putative gene cluster of *A. carbonarius*.

**Table S2.** Features of BRLZ domains used in the Maximum Likelihood phylogenetic analysis.

| Species (Strain)                  | Protein ID <sup>a</sup> | Sequence of BRLZ Domain <sup>b</sup>                                    |
|-----------------------------------|-------------------------|-------------------------------------------------------------------------|
| <i>OTAbZIPs</i>                   |                         |                                                                         |
| <i>A. affinis</i> (CBS 129190)    | 267643                  | EVKQRRQKYHEKYKERNRLAAGKSRQKQVDLIALLE-AERSDEERRRRRALEDEIQKIQKDLYAIKQELLH |
| <i>A. albertensis</i> (IBT 14317) | 155937                  | KYHEKYKERNRLAAGRSRQKQVDLIELLEAERREEERRR-KALEEEIQRIQKELLAMKEELRH         |
| <i>A. alliaceus</i> (CBS 536.65)  | 313480                  | KYHEKYKERNRLAAGRSRQKQVDLIELLEAERREEERRR-KALEEEIQRIQKELLAMKEELRH         |
| <i>A. carbonarius</i> (ITEM 5010) | 7821                    | KYHEKYKERNRVAAGKSRQKQVDLIELLQAEQREEERRR-KALERELSQIHKELLDLQELQH          |
| <i>A. cretensis</i> (CBS 112802)  | 260188                  | EVKQRRQKYHEKYKERNRLAAGKSRQKQVDLIALLE-AERRDEERRRRRALEDEIQKIQKDLYAIKQELLH |
| <i>A. elegans</i> (CBS 116.39)    | 385076                  | KYHEKYKERNRLAAGKSRQKQVDLIALLE-                                          |

|                                                        |                    |                                                                                                           |
|--------------------------------------------------------|--------------------|-----------------------------------------------------------------------------------------------------------|
| <i>A. flocculosus</i> (CBS 112785)                     | 228703             | AERRDEERRRRRALEDEIRQIQKELYAIKQELLH<br>KYHEKYKERNRLAAGKSRQKQVDLIALLE-<br>AERRDEERRRRRALEDEIQIKQDLYAIKQELLH |
| <i>A. muricatus</i> (CBS 112808)                       | 167285             | KYHEKYKERNRLAAGKSRQKQVDLIALLEAERRDEERRRQAL-<br>EGEIQQIQKELYAIKQELHS                                       |
| <i>A. niger</i> (ATCC 13496)                           | 368844             | KYHEKYKERNRLAAGRSRQKQADLINLLQAEQQEEERRRKALE-<br>LEIANMQKELVDMKQELQH                                       |
| <i>A. niger</i> (CBS 513.88)                           | 167295             | KYHEKYKERNRLAAGRSRQKQADLINLLQAEQQEEERRRKALE-<br>LEIANMQKELVDMKQELQH                                       |
| <i>A. niger</i> ( <i>lacticoffeatus</i> ) (CBS 101883) | 438778             | KYHEKYKERNRLAAGRSRQKQADLINLLQAEQQEEERRRKALE-<br>LEIANMQKELVDMKQELQH                                       |
| <i>A. ochraceus</i> (fc-1)                             | OTAR1 <sup>c</sup> | KYHEKYKERNRLAAGKSRQKQVDLIALLE-<br>AERRDEERRRRRALEDEIRKIQKDLLAIKQELHS                                      |
| <i>A. pulvericola</i> (CBS 137327)                     | 431723             | KYHEKYKERNRLAAGKSRQKQVDLIALLEAERRDEERRRRRALE-<br>HEIQIKQDLYAMKQELLH                                       |
| <i>A. roseoglobulosus</i> (CBS 112800)                 | 176400             | SEEVKQLRRKYHEKYKERNRLAAGKSRQKQVDLIALLE-<br>AERRDEERRRRRALEDEIQIQRDLYAIKQELHN                              |
| <i>A. sclerotii carbonarius</i> (CBS 121057)           | 328118             | KYHEKYKERNRLAAGRSRQKQVDLIELLQAEQREEERRRQALEKEI-<br>AQIQKELEDMKQELQH                                       |
| <i>A. sclerotioniger</i> (CBS 115572)                  | 593114             | KYHEKYKERNRLAAGKSRQKQADLIELLQAEQREEERRRQALEKEI-<br>AQMOKDLVDMKQELQH                                       |
| <i>A. steynii</i> (IBT 23096)                          | 473593             | KYHEKYKERNRLAAGKSRQKQVDLIALLE-<br>AERRDEERRRRRALEDEIRQIQKELYAIKQELLH                                      |
| <i>A. subramanianii</i> (CBS 138230)                   | 274032             | SDEVKQLRRKYHEKYKERNRLAASKSRQKQVDLIALLEAERG-<br>DEERRRRRALEDEIRQIQRDLYAIKQELHN                             |
| <i>A. welwitschiae</i> (CBS 139.54b)                   | 172341             | KYHEKYKERNRLAAGRSRQKQADLINLLQAEQQEEERRR-<br>KALEQEIANMHKELVDMKQELYH                                       |
| <i>A. westerdijkiae</i> (CBS 112803)                   | 245987             | KYHEKYKERNRLAAGKSRQKQVDLIALLE-<br>AERRDEERRRRRALEDEIRKIQKDLLAIKQELHS                                      |
| <i>P. nordicum</i> (DAOMC 185683)                      | 11413              | KYHEKYKERNRLAAGKSRQKQVDLIALLEAERRDEERRRRVLEEEIQKIK-<br>KDLFAIKQELHH                                       |
| <i>A. carbonarius</i> bZIPs                            |                    |                                                                                                           |
|                                                        | 132388             | DSRERRKREHFLERNRVAANKCRK-<br>KKKEHAKQLESRCMVSRQNTLLESEVDHLKGEILNLKNELLR                                   |
|                                                        | 203634             | TDEEKRNFLERNRVAALKCRQRKKQWLANLQAKVELFTSENDALTAT-<br>VTQLREEIVNLKTLLLA                                     |
|                                                        | 204486             | LTSEPTSKRKAQNRAAQRAFRRERKEKHLKDLETKVDELQAAS-<br>DNANQENGLLRAQIERLQVELRE                                   |
|                                                        | 207072             | DSADPAAMKRARNTAARKSRARKLERQGEMERRRIEELEKL-<br>LEESQQREEYWRNVAENG                                          |
| <i>A. carbonarius</i> (ITEM 5010)                      | 207738             | KKLSSKERRQLRNKVSARAFRRRKEYIGQLESEVAAKTNEA-<br>HELRLQNRALFEENARLTDLARM                                     |
|                                                        | 208150             | EKEQRRIERVLRNRAAAQTSRERKRLE-<br>MEKLENEKIQMEQQNQFLQRLSQMEAENNRNLNQQIAQ<br>EKEESLT-                        |
|                                                        | 208259             | PAQSKRKAQNRAAQRAFRRERKERHVRELEEKVSNLENESTSLMADNERL<br>KRELAKFTTENEI                                       |
|                                                        | 208905             | ATDTPPTKRKAQNRAAQRAFRRERRAARVNELEDQIKKIEDDHEIHVAT-<br>FKDQISTLSLEVEQCRSEMAW                               |
|                                                        | 209595             | KRPLSTSKRAAQNRAAQRAFRRQRKESYIRKLEEQVKEFEAT-                                                               |

---

NEALKQLQSENYQLREYIIN  
209790 ADRIKREKFLERNRVAASKCRHKKKLHTEM-  
LQHCHDDLKSKKTELSVLADKLRSELLALKNELLO  
506085 IKELKQQKRLLRNRQAALDSRQRKKLHTEKLEEEKKQFTQVISDLEEEL-  
QNMRLREAELIREKGE

---

a: jgi.doe.gov. b: BRLZ domain obtained by using SMART (<http://smart.embl-heidelberg.de/>) and used for the Maximum Likelihood phylogenetic analysis. c: OTAR1 protein sequence obtained from its nucleotide sequence by using ExPaSy translation tool (<http://expasy.org/tools/dna.html>). The OTAR1 nucleotide sequence of *A. westerdijkiae* fc-1 was identified by BLASTn analysis on the assembled genome ([www.ncbi.nlm.nih.gov/assembly/GCA\\_004849945.1](http://www.ncbi.nlm.nih.gov/assembly/GCA_004849945.1)) using the *A. westerdijkiae* CBS 112803 OTAbZIP sequence (ID: 245987, jgi.doe.gov) as query.

**Table S3.** Detail of the Transcription factor binding motif (TFBM) identified by MEME in the OTA-gene cluster upstream, downstream and intergenic sequences.

| Fungal Species        | Genomic Region* | Strand | Start | p-Value                |                               |
|-----------------------|-----------------|--------|-------|------------------------|-------------------------------|
|                       |                 |        |       |                        |                               |
| <i>A. affinis</i>     | OTApks/hp       | +      | 94    | 6.93×10 <sup>-7</sup>  | A T T G A C G T G T A G G A A |
| <i>A. affinis</i>     | OTApks/hp       | +      | 114   | 4.37× 10 <sup>-6</sup> | C A T G A C G T G T A T T G C |
| <i>A. affinis</i>     | OTAnps/OTAp450  | +      | 323   | 6.59× 10 <sup>-8</sup> | T A T G A C G T G T A A A T C |
| <i>A. affinis</i>     | OTAnps/OTAp450  | +      | 354   | 3.44× 10 <sup>-7</sup> | A A T G A G G T G T A G A A C |
| <i>A. affinis</i>     | OTAp450/OTAbZIP | -      | 714   | 2.51× 10 <sup>-9</sup> | A A T G A C G T G T A A A A C |
| <i>A. albertensis</i> | OTApks/hp       | -      | 66    | 7.53× 10 <sup>-9</sup> | A A T G A C G T G T A G A T C |
| <i>A. albertensis</i> | OTApks/hp       | -      | 86    | 6.03× 10 <sup>-6</sup> | G C T G A C G T G G A A A T G |
| <i>A. albertensis</i> | OTAnps/OTAhah   | -      | 154   | 3.33× 10 <sup>-8</sup> | A A T G A C G T G T A A A G A |
| <i>A. albertensis</i> | OTAhah/OTAp450  | +      | 9     | 1.76× 10 <sup>-6</sup> | A C T G A C G T G T A G G A T |
| <i>A. alliaceus</i>   | OTApks/hp       | +      | 174   | 7.53× 10 <sup>-9</sup> | A A T G A C G T G T A G A T C |
| <i>A. alliaceus</i>   | OTApks/hp       | +      | 154   | 6.03× 10 <sup>-6</sup> | G C T G A C G T G G A A A T G |
| <i>A. alliaceus</i>   | OTAnps/OTAhah   | +      | 422   | 3.33× 10 <sup>-8</sup> | A A T G A C G T G T A A A G A |
| <i>A. alliaceus</i>   | OTAhah/OTAp450  | -      | 1648  | 2.05× 10 <sup>-6</sup> | A C T G A C G T G T A G G G T |
| <i>A. alliaceus</i>   | OTAhah/OTAp450  | -      | 1668  | 8.66× 10 <sup>-6</sup> | A A T T A C G T G T A G A T T |
| <i>A. alliaceus</i>   | OTAp450/OTAbZIP | -      | 706   | 1.60× 10 <sup>-7</sup> | A A T G A C G T G T A A A A T |
| <i>A. carbonarius</i> | OTApks/hp       | -      | 100   | 2.48× 10 <sup>-7</sup> | G C T G A C G T G T A A A T C |
| <i>A. carbonarius</i> | OTApks/hp       | -      | 79    | 8.99× 10 <sup>-7</sup> | G T T G A C G T G T A G G G C |
| <i>A. carbonarius</i> | OTAnps/OTAp450  | +      | 402   | 1.87× 10 <sup>-7</sup> | A A T G A C G T G T A A C C C |
| <i>A. carbonarius</i> | OTAp450/OTAbZIP | +      | 110   | 1.72× 10 <sup>-8</sup> | A A T G A C G T G T A A A A A |
| <i>A. carbonarius</i> | OTAhah (UTR-5') | -      | 408   | 1.38× 10 <sup>-6</sup> | C T T G A C G T G T A A G C C |

|                              |                                         |   |      |                         |                               |
|------------------------------|-----------------------------------------|---|------|-------------------------|-------------------------------|
| <i>A. carbonarius</i>        | OTAh <sub>al</sub> (UTR-3')             | + | 407  | 5.47 × 10 <sup>-6</sup> | A G T G A G G T G T A A G T G |
| <i>A. carbonarius</i>        | OTAh <sub>al</sub> (UTR-5')             | - | 428  | 5.47 × 10 <sup>-6</sup> | T G T G A C G T G T A G G A T |
| <i>A. cretensis</i>          | OTAp <sub>ks</sub> /hp                  | - | 67   | 6.93 × 10 <sup>-7</sup> | A T T G A C G T G T A G G A A |
| <i>A. cretensis</i>          | OTAp <sub>ks</sub> /hp                  | - | 47   | 4.37 × 10 <sup>-6</sup> | C A T G A C G T G T A T T G C |
| <i>A. cretensis</i>          | OTAn <sub>ps</sub> /OTAp <sub>450</sub> | - | 134  | 3.44 × 10 <sup>-7</sup> | T A T G A C G T G T A A C T C |
| <i>A. cretensis</i>          | OTAn <sub>ps</sub> /OTAp <sub>450</sub> | - | 103  | 3.44 × 10 <sup>-7</sup> | A A T G A G G T G T A G A A C |
| <i>A. cretensis</i>          | OTAp <sub>450</sub> /OTAbZIP            | + | 85   | 2.51 × 10 <sup>-9</sup> | A A T G A C G T G T A A A A C |
| <i>A. cretensis</i>          | OTAbZIP/OTAh <sub>al</sub>              | - | 1720 | 2.19 × 10 <sup>-7</sup> | G A T G A C G T G T A A G T C |
| <i>A. elegans</i>            | OTAp <sub>ks</sub> /OTAn <sub>ps</sub>  | + | 697  | 5.83 × 10 <sup>-7</sup> | A T T G A C G T G T A G G A G |
| <i>A. elegans</i>            | OTAp <sub>ks</sub> /OTAn <sub>ps</sub>  | + | 717  | 1.91 × 10 <sup>-6</sup> | C A T G A C G T G T A T C C C |
| <i>A. elegans</i>            | OTAn <sub>ps</sub> /OTAp <sub>450</sub> | + | 421  | 5.18 × 10 <sup>-7</sup> | T A T G A C G T G T A A C T A |
| <i>A. elegans</i>            | OTAn <sub>ps</sub> /OTAp <sub>450</sub> | + | 452  | 5.83 × 10 <sup>-7</sup> | G A T G A G G T G T A G A A C |
| <i>A. elegans</i>            | OTAp <sub>450</sub> /OTAbZIP            | - | 921  | 1.38 × 10 <sup>-7</sup> | T A T G A C G T G T A A A G A |
| <i>A. elegans</i>            | OTAbZIP/OTAh <sub>al</sub>              | + | 171  | 7.53 × 10 <sup>-9</sup> | A A T G A C G T G T A A A A G |
| <i>A. elegans</i>            | OTAbZIP/OTAh <sub>al</sub>              | + | 734  | 6.93 × 10 <sup>-7</sup> | A A T G A C G T G T A A G T T |
| <i>A. flocculosus</i>        | OTAp <sub>ks</sub> /hp                  | - | 211  | 1.13 × 10 <sup>-6</sup> | T T T G A C G T G T A G G A G |
| <i>A. flocculosus</i>        | OTAp <sub>ks</sub> /hp                  | - | 191  | 4.37 × 10 <sup>-6</sup> | C A T G A C G T G T A T T G C |
| <i>A. flocculosus</i>        | OTAn <sub>ps</sub> /OTAp <sub>450</sub> | - | 167  | 4.57 × 10 <sup>-7</sup> | A A T G A G G T G T A G A G C |
| <i>A. flocculosus</i>        | OTAn <sub>ps</sub> /OTAp <sub>450</sub> | - | 198  | 5.83 × 10 <sup>-7</sup> | T A T G A C G T G T A A C C G |
| <i>A. flocculosus</i>        | OTAp <sub>450</sub> /OTAbZIP            | + | 119  | 1.38 × 10 <sup>-7</sup> | T A T G A C G T G T A A A G A |
| <i>A. flocculosus</i>        | OTAbZIP/OTAh <sub>al</sub>              | - | 2295 | 1.16 × 10 <sup>-7</sup> | G A T G A C G T G T A A A C A |
| <i>A. flocculosus</i>        | OTAbZIP/OTAh <sub>al</sub>              | - | 1901 | 1.91 × 10 <sup>-6</sup> | G G T G A C G T G T A A G A C |
| <i>A. muricatus</i>          | OTAp <sub>ks</sub> /hp                  | - | 135  | 2.19 × 10 <sup>-7</sup> | A T T G A C G T G T A G A T A |
| <i>A. muricatus</i>          | OTAp <sub>ks</sub> /hp                  | - | 115  | 2.36 × 10 <sup>-6</sup> | C A T G A C G T G T A T C C A |
| <i>A. muricatus</i>          | OTAn <sub>ps</sub> /OTAp <sub>450</sub> | - | 173  | 4.57 × 10 <sup>-7</sup> | A A T G A G G T G T A G A G C |
| <i>A. muricatus</i>          | OTAn <sub>ps</sub> /OTAp <sub>450</sub> | - | 204  | 1.91 × 10 <sup>-6</sup> | T A T G A C G T G T A A T T A |
| <i>A. muricatus</i>          | OTAp <sub>450</sub> /OTAbZIP            | + | 121  | 1.87 × 10 <sup>-7</sup> | A A T G A C G T G T A G A T T |
| <i>A. muricatus</i>          | OTAbZIP/OTAh <sub>al</sub>              | - | 1858 | 2.44 × 10 <sup>-8</sup> | A A T G A C G T G T A A A T A |
| <i>A. niger</i> (ATCC 13496) | OTAp <sub>ks</sub> /hp                  | - | 144  | 2.19 × 10 <sup>-7</sup> | A T T G A C G T G T A A A T A |

|                                  |                 |   |      |                       |                               |
|----------------------------------|-----------------|---|------|-----------------------|-------------------------------|
| <i>A. niger</i> (ATCC 13496)     | OTApks/hp       | – | 123  | 3.44×10 <sup>-7</sup> | G T T G A C G T G T A G A G G |
| <i>A. niger</i> (ATCC 13496)     | OTApks/hp       | + | 107  | 2.53×10 <sup>-6</sup> | A C T G G C G T G T A G A T G |
| <i>A. niger</i> (ATCC 13496)     | OTAnps/OTAp450  | – | 114  | 5.18×10 <sup>-7</sup> | T A T G A C G T G T A A C C C |
| <i>A. niger</i> (ATCC 13496)     | OTAnps/OTAp450  | – | 94   | 6.36×10 <sup>-7</sup> | G A T G A G G T G T A G A A G |
| <i>A. niger</i> (ATCC 13496)     | OTAp450/OTAbZIP | + | 100  | 3.33×10 <sup>-8</sup> | G A T G A C G T G T A G A A G |
| <i>A. niger</i> (ATCC 13496)     | after /OTAhal   | – | 1042 | 4.37×10 <sup>-6</sup> | C C T G A T G T G T A G A G C |
| <i>A. niger</i> (CBS 513.88)     | OTApks/OTAnps   | + | 941  | 2.19×10 <sup>-7</sup> | A T T G A C G T G T A A A T A |
| <i>A. niger</i> (CBS 513.88)     | OTApks/OTAnps   | + | 962  | 3.44×10 <sup>-7</sup> | G T T G A C G T G T A G A G G |
| <i>A. niger</i> (CBS 513.88)     | OTApks/OTAnps   | – | 978  | 2.53×10 <sup>-6</sup> | A C T G G C G T G T A G A T G |
| <i>A. niger</i> (CBS 513.88)     | OTAnps/OTAp450  | + | 401  | 5.18×10 <sup>-7</sup> | T A T G A C G T G T A A C C C |
| <i>A. niger</i> (CBS 513.88)     | OTAnps/OTAp450  | + | 421  | 6.36×10 <sup>-7</sup> | G A T G A G G T G T A G A A G |
| <i>A. niger</i> (CBS 513.88)     | OTAp450/OTAbZIP | – | 836  | 3.33×10 <sup>-8</sup> | G A T G A C G T G T A G A A G |
| <i>A. niger</i> (CBS 513.88)     | OTAbZIP/OTAhal  | + | 152  | 2.19×10 <sup>-7</sup> | A A T G A C G T G T A A G G A |
| <i>A. niger</i> (CBS 513.88)     | OTAbZIP/OTAhal  | + | 173  | 1.52×10 <sup>-6</sup> | C C T G A C G T G T A A C C G |
| <i>A. niger</i> (CBS 513.88)     | after /OTAhal   | + | 40   | 4.37×10 <sup>-6</sup> | C C T G A T G T G T A G A G C |
| <i>A. niger</i> (lacticoffeatus) | OTApks/OTAnps   | + | 1001 | 2.19×10 <sup>-7</sup> | A T T G A C G T G T A A A T A |
| <i>A. niger</i> (lacticoffeatus) | OTApks/OTAnps   | + | 1022 | 3.44×10 <sup>-7</sup> | G T T G A C G T G T A G A G G |
| <i>A. niger</i> (lacticoffeatus) | OTApks/OTAnps   | – | 1038 | 2.53×10 <sup>-6</sup> | A C T G G C G T G T A G A T G |
| <i>A. niger</i> (lacticoffeatus) | OTAnps/OTAp450  | + | 401  | 5.18×10 <sup>-7</sup> | T A T G A C G T G T A A C C C |
| <i>A. niger</i> (lacticoffeatus) | OTAnps/OTAp450  | + | 421  | 6.36×10 <sup>-7</sup> | G A T G A G G T G T A G A A G |
| <i>A. niger</i> (lacticoffeatus) | OTAp450/OTAbZIP | – | 836  | 3.33×10 <sup>-8</sup> | G A T G A C G T G T A G A A G |
| <i>A. niger</i> (lacticoffeatus) | OTAbZIP/OTAhal  | + | 152  | 2.19×10 <sup>-7</sup> | A A T G A C G T G T A A G G A |
| <i>A. niger</i> (lacticoffeatus) | OTAbZIP/OTAhal  | + | 173  | 1.52×10 <sup>-6</sup> | C C T G A C G T G T A A C C G |
| <i>A. niger</i> (lacticoffeatus) | after /OTAhal   | + | 7    | 4.37×10 <sup>-6</sup> | C C T G A T G T G T A G A G C |
| <i>A. pulvericola</i>            | OTAnps/OTAp450  | – | 168  | 4.57×10 <sup>-7</sup> | A A T G A G G T G T A G A G C |
| <i>A. pulvericola</i>            | OTAnps/OTAp450  | – | 199  | 5.83×10 <sup>-7</sup> | T A T G A C G T G T A A C C G |
| <i>A. pulvericola</i>            | OTAp450/OTAbZIP | + | 28   | 4.57×10 <sup>-7</sup> | T A T G A C G T G T A A G A A |
| <i>A. pulvericola</i>            | OTAbZIP/OTAhal  | – | 1474 | 1.91×10 <sup>-6</sup> | G G T G A C G T G T A A G A C |
| <i>A. roseoglobulosus</i>        | OTApks/hp       | – | 61   | 5.18×10 <sup>-7</sup> | C A T G A C G T G T A T A A C |
| <i>A. roseoglobulosus</i>        | OTAnps/OTAp450  | – | 8    | 5.18×10 <sup>-7</sup> | A A T G A G G T G T A G A A A |
| <i>A. roseoglobulosus</i>        | OTAnps/OTAp450  | – | 40   | 7.87×10 <sup>-8</sup> | T A T G A C G T G T A A A T G |

|                                 |                 |   |      |                       |                               |
|---------------------------------|-----------------|---|------|-----------------------|-------------------------------|
| <i>A. roseoglobulosus</i>       | OTAp450/OTAbZIP | + | 55   | 4.03×10 <sup>-7</sup> | C A T G A C G T G T A A A A T |
| <i>A. sclerotiiicarbonarius</i> | OTApks/hp       | − | 145  | 2.05×10 <sup>-6</sup> | A T T G A C G T G T A G G G T |
| <i>A. sclerotiiicarbonarius</i> | OTApks/hp       | + | 128  | 7.46×10 <sup>-6</sup> | G C T G G C G T G T A T A T C |
| <i>A. sclerotiiicarbonarius</i> | OTApks/hp       | − | 165  | 1.38×10 <sup>-7</sup> | A C T G A C G T G T A A A T C |
| <i>A. sclerotiiicarbonarius</i> | OTAnps/OTAp450  | − | 131  | 1.16×10 <sup>-7</sup> | G A T G A C G T G T A A A C A |
| <i>A. sclerotiiicarbonarius</i> | OTAnps/OTAp450  | − | 109  | 1.13×10 <sup>-6</sup> | A A T G A T G T G T A G A A G |
| <i>A. sclerotiiicarbonarius</i> | OTAbZIP/OTAhAl  | − | 475  | 1.13×10 <sup>-6</sup> | C C T G A C G T G T A A C T G |
| <i>A. sclerotiiicarbonarius</i> | OTAbZIP/OTAhAl  | − | 495  | 1.25×10 <sup>-6</sup> | T G T G A C G T G T A A A T G |
| <i>A. sclerotioniger</i>        | OTApks/hp       | + | 235  | 6.36×10 <sup>-7</sup> | A T T G A C G T G T A G G G C |
| <i>A. sclerotioniger</i>        | OTApks/hp       | + | 215  | 1.13×10 <sup>-6</sup> | T G T G A C G T G T A A A T C |
| <i>A. sclerotioniger</i>        | OTApks/hp       | − | 251  | 8.25×10 <sup>-6</sup> | C T T G G C G T G T A T A T C |
| <i>A. sclerotioniger</i>        | OTAnps/OTAp450  | + | 526  | 1.87×10 <sup>-7</sup> | A A T G A C G T G T A A C C C |
| <i>A. sclerotioniger</i>        | OTAnps/OTAp450  | + | 557  | 1.91×10 <sup>-6</sup> | G A T G A T G T G T A A A A A |
| <i>A. sclerotioniger</i>        | OTAp450/OTAbZIP | − | 515  | 6.59×10 <sup>-8</sup> | G A T G A C G T G T A G A C C |
| <i>A. sclerotioniger</i>        | OTAbZIP/OTAhAl  | + | 159  | 1.76×10 <sup>-6</sup> | C T T G A C G T G T A G C C A |
| <i>A. sclerotioniger</i>        | OTAbZIP/OTAhAl  | + | 139  | 3.33×10 <sup>-6</sup> | T G T G A C G T G T A G A G T |
| <i>A. steynii</i>               | OTApks/hp       | + | 164  | 5.83×10 <sup>-7</sup> | A T T G A C G T G T A G G A G |
| <i>A. steynii</i>               | OTApks/hp       | + | 184  | 1.91×10 <sup>-6</sup> | C A T G A C G T G T A T C C C |
| <i>A. steynii</i>               | OTAnps/OTAp450  | + | 539  | 5.18×10 <sup>-7</sup> | T A T G A C G T G T A A C T A |
| <i>A. steynii</i>               | OTAnps/OTAp450  | + | 570  | 5.83×10 <sup>-7</sup> | G A T G A G G T G T A G A A C |
| <i>A. steynii</i>               | OTAp450/OTAbZIP | − | 922  | 6.59×10 <sup>-8</sup> | T A T G A C G T G T A A A A G |
| <i>A. steynii</i>               | OTAbZIP/OTAhAl  | + | 171  | 7.53×10 <sup>-9</sup> | A A T G A C G T G T A A A A G |
| <i>A. steynii</i>               | OTAbZIP/OTAhAl  | + | 734  | 1.38×10 <sup>-7</sup> | A A T G A C G T G T A A G T G |
| <i>A. subramanianii</i>         | OTApks/hp       | − | 144  | 1.60×10 <sup>-7</sup> | A T T G A C G T G T A G A T G |
| <i>A. subramanianii</i>         | OTApks/hp       | − | 124  | 3.56×10 <sup>-6</sup> | C A T G A C G T G T A T C A T |
| <i>A. subramanianii</i>         | OTAnps/OTAp450  | − | 173  | 4.03×10 <sup>-7</sup> | A A T G A G G T G T A G A A G |
| <i>A. subramanianii</i>         | OTAnps/OTAp450  | − | 204  | 5.18×10 <sup>-7</sup> | T A T G A C G T G T A A C T A |
| <i>A. subramanianii</i>         | OTAp450/OTAbZIP | + | 95   | 4.03×10 <sup>-7</sup> | C A T G A C G T G T A A A A T |
| <i>A. subramanianii</i>         | OTAbZIP/OTAhAl  | − | 2118 | 5.28×10 <sup>-8</sup> | G A T G A C G T G T A A A A A |
| <i>A. welwitschiae</i>          | OTApks/OTAnps   | + | 949  | 2.19×10 <sup>-7</sup> | A T T G A C G T G T A A A T A |
| <i>A. welwitschiae</i>          | OTApks/OTAnps   | + | 970  | 3.44×10 <sup>-7</sup> | G T T G A C G T G T A G A G G |

|                         |                        |   |      |                       |                               |
|-------------------------|------------------------|---|------|-----------------------|-------------------------------|
| <i>A. welwitschiae</i>  | <i>OTApks/OTAnps</i>   | – | 986  | 2.53×10 <sup>−6</sup> | A C T G G C G T G T A G A T G |
| <i>A. welwitschiae</i>  | <i>OTAnps/OTAp450</i>  | + | 381  | 5.18×10 <sup>−7</sup> | T A T G A C G T G T A A C C C |
| <i>A. welwitschiae</i>  | <i>OTAnps/OTAp450</i>  | + | 401  | 6.36×10 <sup>−7</sup> | G A T G A G G T G T A G A A G |
| <i>A. welwitschiae</i>  | <i>OTAp450/OTAbZIP</i> | – | 836  | 3.33×10 <sup>−8</sup> | G A T G A C G T G T A G A A G |
| <i>A. welwitschiae</i>  | <i>OTAbZIP/OTAhah</i>  | + | 152  | 2.19×10 <sup>−7</sup> | A A T G A C G T G T A A G G A |
| <i>A. welwitschiae</i>  | <i>OTAbZIP/OTAhah</i>  | + | 173  | 1.76×10 <sup>−6</sup> | C C T G A C G T G T A A C C A |
| <i>A. welwitschiae</i>  | <i>after /OTAhah</i>   | + | 40   | 4.37×10 <sup>−6</sup> | C C T G A T G T G T A G A G C |
| <i>A. westerdijkiae</i> | <i>OTApks/hp</i>       | – | 164  | 3.44×10 <sup>−7</sup> | A T T G A C G T G T A G A C A |
| <i>A. westerdijkiae</i> | <i>OTApks/hp</i>       | – | 144  | 1.52×10 <sup>−6</sup> | C A T G A C G T G T A T C A G |
| <i>A. westerdijkiae</i> | <i>OTAnps/OTAp450</i>  | – | 16   | 5.18×10 <sup>−7</sup> | T A T G A C G T G T A A C T A |
| <i>A. westerdijkiae</i> | <i>OTAp450/OTAbZIP</i> | + | 110  | 1.16×10 <sup>−7</sup> | T A T G A C G T G T A A A T A |
| <i>A. westerdijkiae</i> | <i>OTAbZIP/OTAhah</i>  | – | 2726 | 7.53×10 <sup>−9</sup> | A A T G A C G T G T A A A A G |
| <i>A. westerdijkiae</i> | <i>OTAbZIP/OTAhah</i>  | – | 2592 | 8.99×10 <sup>−7</sup> | A A T G A C G T G T A A T A A |
| <i>P. nordicum</i>      | <i>OTApks/hp</i>       | + | 174  | 3.44×10 <sup>−7</sup> | A T T G A C G T G T A G A C A |
| <i>P. nordicum</i>      | <i>OTApks/hp</i>       | + | 194  | 6.35×10 <sup>−6</sup> | A A T G A C G T G T A T T G T |
| <i>P. nordicum</i>      | <i>OTAp450/OTAbZIP</i> | – | 669  | 1.16×10 <sup>−7</sup> | C A T G A C G T G T A A A G A |
| <i>P. nordicum</i>      | <i>OTAbZIP/OTAhah</i>  | + | 548  | 2.19×10 <sup>−7</sup> | G A T G A C G T G T A A G T C |
| <i>P. nordicum</i>      | <i>OTAbZIP/OTAhah</i>  | + | 159  | 5.28×10 <sup>−8</sup> | A A T G A C G T G T A A A C A |

\*For each fungal strain, the genomic regions used for the analysis were the intergenic regions between the reported genes, or corresponded to the untranslated regions (UTR) of the specified genes. *OTApks*: polyketide synthase; *OTAnps*: nonribosomal peptide synthase; *OTAp450*: cytochrome P450 monooxygenase; *OTAbZIP*: bZIP transcription factor; *OTAhah*: halogenase; *hp* means the hypothetical protein between the polyketide synthase (*OTApks*) and the nonribosomal peptide synthase (*OTAnps*).



**Table S4.** TOMTOM analysis representing the homology of TFBM identified by MEME with those of *Saccharomyces cerevisiae*.

| Name*               | Transcription Factor Class            | p-Value               | E-Value               | q-Value               |
|---------------------|---------------------------------------|-----------------------|-----------------------|-----------------------|
| MA0351.1 (DOT6)     | Tryptophan cluster factors            | 4.36×10 <sup>-4</sup> | 7.68×10 <sup>-2</sup> | 1.51×10 <sup>-1</sup> |
| MA0409.1 (TYE7)     | Basic helix-loop-helix factors (bHLH) | 2.21×10 <sup>-3</sup> | 3.89×10 <sup>-1</sup> | 3.54×10 <sup>-1</sup> |
| MA0318.1 (HMRA2)    | TALE-type homeo domain factors        | 3.07×10 <sup>-3</sup> | 5.41×10 <sup>-1</sup> | 3.54×10 <sup>-1</sup> |
| MA0328.2 (MATAPHA2) | TALE-type homeo domain factors        | 4.12×10 <sup>-3</sup> | 7.25×10 <sup>-1</sup> | 3.55×10 <sup>-1</sup> |
| MA0421.1 (NSI1)     | Tryptophan cluster factors            | 5.32×10 <sup>-3</sup> | 9.37×10 <sup>-1</sup> | 3.68×10 <sup>-1</sup> |
| MA0281.1 (CBF1)     | Basic helix-loop-helix factors (bHLH) | 8.12×10 <sup>-3</sup> | 1.43                  | 4.27×10 <sup>-1</sup> |
| MA0329.1 (MBP1)     | APSES-type DNA-binding domain         | 9.59×10 <sup>-3</sup> | 1.69                  | 4.27×10 <sup>-1</sup> |
| MA0286.1 (CST6)     | Basic leucine zipper factors (bZIP)   | 1.04×10 <sup>-2</sup> | 1.83                  | 4.27×10 <sup>-1</sup> |
| MA0416.1 (YAP3)     | Basic leucine zipper factors (bZIP)   | 1.25×10 <sup>-2</sup> | 2.20                  | 4.27×10 <sup>-1</sup> |
| MA0350.1 (TOD6)     | Tryptophan cluster factors            | 1.42×10 <sup>-2</sup> | 2.50                  | 4.27×10 <sup>-1</sup> |
| MA0310.1 (HAC1)     | Basic leucine zipper factors (bZIP)   | 1.45×10 <sup>-2</sup> | 2.55                  | 4.27×10 <sup>-1</sup> |

\*Name of transcription factor binding motif (TFBM) according to the JASPAR database.
